# Supplementary material for: Symmetry controlled photo-selection and charge separation in butadiyne-bridged donor–bridge–acceptor compounds
Source: Royal Society of Chemistry journal article supplement (doi:10.1039/d0cp01235a), 2020-01-01
Supplement: d0cp01235a1.pdf [file d0cp01235a1.pdf]

## Symmetry controlled photo-selection and charge separation in butadiyne-bridged donor-bridge-acceptor compounds

Xiao Li,<sup>a</sup> Jesús Valdiviezo,<sup>b</sup> Susannah D. Banziger,<sup>e</sup> Peng Zhang,<sup>b</sup> Tong Ren,<sup>e\*</sup> David N. Beratan,<sup>b,c,d\*</sup> and Igor V. Rubtsov<sup>a\*</sup>

<sup>a</sup> Department of Chemistry, Tulane University, New Orleans, LA 70118, USA

<sup>b</sup> Department of Chemistry, Duke University, Durham, North Carolina 27708, USA

<sup>c</sup> Department of Physics, Duke University, Durham, North Carolina 27708, USA

<sup>d</sup> Department of Biochemistry, Duke University, Durham, North Carolina 27710, USA

<sup>e</sup> Department of Chemistry, Purdue University, West Lafayette, Indiana 47907, USA

### Table of Contents

1. Details of synthesis
2. Normal mode frequencies DFT computed for Si-C4-NAP, Ph-C4-NAP, and D-C4-NAP (Tables S1-S5).
3. DFT computed frontier orbital compositions for D-C4-NAP and Si-C4-NAP (Figures S1-S2, S9-S10).
4. TR-IR spectra and kinetic traces for Si-C4-NAP in toluene (Figures S3-S8)
5. <sup>1</sup>H NMR and <sup>13</sup>C NMR spectra (Figures S11-S17)

## 1. Details of Synthesis

### 1.1 Materials and measurements

4-ethynyl-*N*-isopropyl-1,8-naphthalimide (**NAP<sup>iPr</sup>C<sub>2</sub>H**) was prepared according to literature procedure<sup>1</sup>. THF was distilled over Na/benzophenone under a N<sub>2</sub> atmosphere. CH<sub>2</sub>Cl<sub>2</sub> was distilled over CaH<sub>2</sub> under N<sub>2</sub>. *N,N*-Dimethyl-4-[(trimethylsilyl)ethynyl]aniline was purchased from Sigma Aldrich, triethylsilylacetylene was purchased from Oakwood Chemical, and pyridine was purchased from Mallinckrodt Chemicals and dried over hot sieves. The synthesis of 4-bromo-ethynyl-*N*-isopropyl-1,8-naphthalimide (**BrC<sub>2</sub>NAP<sup>iPr</sup>**) was performed under ambient atmosphere. All other reactions were carried out using Schlenk techniques under N<sub>2</sub>. UV-Vis-NIR spectra were obtained with a JASCO V-670 UV-Vis-NIR spectrophotometer. Infrared spectra were obtained on a JASCO FT-IR 6300 spectrometer via ATR on a ZnSe crystal. Emission spectra were measured on a Varian Cary Eclipse fluorescence spectrophotometer and quantum yields were measured on Edinburgh Instruments FLS980 steady state fluorescence spectrometer using an integrating sphere attachment. <sup>1</sup>H NMR spectra were recorded on a Varian MERCURY300 NMR and a Varian Inova 300.

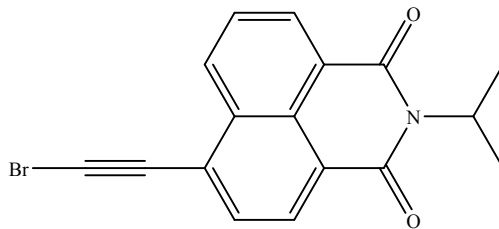

**Preparation of 4-bromo-ethynyl-*N*-isopropyl-1,8-naphthalimide (BrC<sub>2</sub>NAP<sup>iPr</sup>).** 4-Ethynyl-*N*-isopropyl-1,8-naphthalimide (800 mg, 3.0 mmol) was dissolved in acetone with *N*-bromosuccinimide (1.08 grams, 6.1 mmol) and AgNO<sub>3</sub> (52 mg, 0.31 mmol). The solution was stirred at room temperature overnight. The crude reaction mixture was purified via a silica plug (1:1 Hexanes:CH<sub>2</sub>Cl<sub>2</sub>) to yield 980 mg of the desired product as a light yellow solid (94% based on 4-ethynyl-*N*-isopropyl-1,8-naphthalimide). <sup>1</sup>H NMR (300 MHz, Chloroform-*d*) δ 8.63 – 8.56 (m, 2H), 8.50 (d, *J* = 7.6 Hz, 1H), 7.88 (d, *J* = 7.4 Hz, 1H), 7.82 (dd, *J* = 8.4, 7.1 Hz, 1H), 5.46 – 5.39 (m, 1H), 1.59 (d, *J* = 7.0 Hz, 6H). Visible spectra, λ<sub>max</sub> (nm, ε (M<sup>-1</sup> cm<sup>-1</sup>)): 350 (34,400), 367 (31,300); IR (cm<sup>-1</sup>): C=O: 1653 (s), 1693 (s); C≡C: 2188 (s).

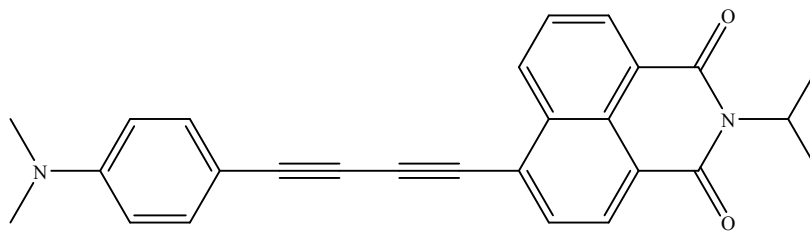

**Preparation of D-C<sub>4</sub>-NAP<sup>iPr</sup>.** A 3-neck round bottom flask was fitted with a side-arm containing CuI (190 mg, 1.0 mmol) and charged with 4-ethynyl-*N,N*-dimethylaniline (290 mg, 2.0 mmol) and dry THF (10 mL). Upon cooling to -10°C, *n*BuLi (1.6 M in hexane, 1.25 mL, 2.0 mmol) was added while stirring and warming to 0°C. After 20 min, CuI was added and the

solution immediately turned bright yellow. It was allowed to stir and warm to room temperature for 1 hr. Pyridine (29 mL) was added while the solution stirred at  $-10^{\circ}\text{C}$ . A solution of dry THF (15 mL) and  $\text{BrC}_2\text{NAP}^{\text{iPr}}$  (340 mg, 1.0 mmol) was added dropwise over 1 h, the solution turned steadily more red. Upon complete addition, the reaction was allowed to stir an additional 10 min and quenched with  $\text{CH}_3\text{OH}$ . The solvent was removed under vacuum. The crude material was extracted from brine with  $\text{CH}_2\text{Cl}_2$  and dried over  $\text{MgSO}_4$ . Purification of the vibrant red solution was achieved through column chromatography (silica gel, 1:1 Hexane: $\text{CH}_2\text{Cl}_2$ ) yielded 205 mg of **D-C<sub>4</sub>-NAP<sup>iPr</sup>** as a bright red solid. (51% based on  $\text{BrC}_2\text{NAP}^{\text{iPr}}$ ).  $^1\text{H}$  NMR (300 MHz, Chloroform-*d*)  $\delta$  8.65 (d,  $J = 8.3$  Hz, 1H), 8.59 (d,  $J = 7.3$  Hz, 1H), 8.48 (d,  $J = 7.6$  Hz, 1H), 7.90 (d,  $J = 7.7$  Hz, 1H), 7.80 (t,  $J = 7.8$  Hz, 1H), 7.46 (d,  $J = 8.7$  Hz, 2H), 6.64 (d,  $J = 8.8$  Hz, 2H), 5.42 (hept,  $J = 6.7$  Hz, 1H), 3.03 (s, 6H), 1.60 (d,  $J = 6.9$  Hz, 6H).  $^{13}\text{C}$  NMR (75 MHz,  $\text{CDCl}_3$ )  $\delta$  164.09, 163.79, 150.76, 133.99, 132.06, 131.99, 131.58, 131.39, 129.96, 127.91, 127.50, 126.49, 123.44, 122.66, 111.57, 106.86, 87.85, 84.22, 77.68, 77.46, 77.04, 76.62, 72.11, 45.41, 40.16, 19.90. Visible spectra,  $\lambda_{\text{max}}$  (nm,  $\epsilon$  ( $\text{M}^{-1} \text{cm}^{-1}$ )): 337 (26,000), 454 (18,200); IR ( $\text{cm}^{-1}$ ): C=O: 1653 (s), 1692 (s); C $\equiv$ C: 2118 (w), 2133 (m), 2184 (s).

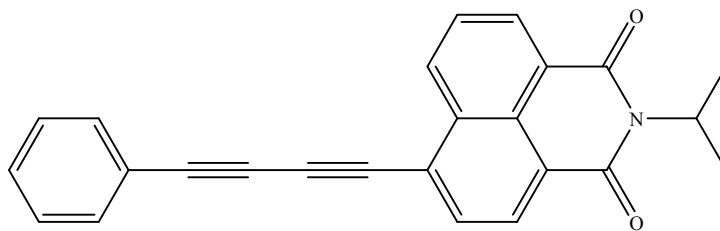

**Preparation of Ph-C<sub>4</sub>-NAP<sup>iPr</sup>.** A 3-neck round bottom flask was fitted with a side-arm containing  $\text{CuI}$  (280 mg, 1.5 mmol) and charged with phenylacetylene (0.5 mL, 4.6 mmol) and dry THF (5 mL). Upon cooling to  $-10^{\circ}\text{C}$ ,  $n\text{BuLi}$  (1.6 M in hexane, 1.6 mL, 2.6 mmol) was added while stirring and warming to  $0^{\circ}\text{C}$ . After 20 min,  $\text{CuI}$  was added and the solution immediately turned orange. It was allowed to stir and warm to room temperature for 1 hr. Pyridine (15 mL) was added while the solution stirred at  $-10^{\circ}\text{C}$ . A solution of dry THF (20 mL) and  $\text{BrC}_2\text{NAP}^{\text{iPr}}$  (430 mg, 1.2 mmol) was added dropwise over 1.5 h, the solution turned red. Upon complete addition, the reaction was allowed to stir an additional 10 min and quenched with  $\text{CH}_3\text{OH}$ . The solvent was removed under vacuum. The crude material was extracted from brine with  $\text{CH}_2\text{Cl}_2$  and dried over  $\text{MgSO}_4$ . Purification was achieved through column chromatography (silica gel, 1:1 Hexane: $\text{CH}_2\text{Cl}_2$ ). Recrystallization from  $\text{CH}_2\text{Cl}_2$  with hexane yielded 189 mg of **Ph-C<sub>4</sub>-NAP<sup>iPr</sup>** as a yellow solid. (42% based on  $\text{BrC}_2\text{NAP}^{\text{iPr}}$ ).  $^1\text{H}$  NMR (300 MHz, Chloroform-*d*)  $\delta$  8.66 – 8.58 (m, 2H), 8.50 (d,  $J = 7.6$  Hz, 1H), 7.94 (d,  $J = 7.6$  Hz, 1H), 7.82 (t,  $J = 7.8$  Hz, 1H), 7.58 (dd,  $J = 7.7, 1.5$  Hz, 2H), 7.46 – 7.34 (m, 3H), 5.42 (hept,  $J = 6.8$  Hz, 1H), 1.60 (d,  $J = 6.9$  Hz, 6H).  $^{13}\text{C}$  NMR (75 MHz,  $\text{CDCl}_3$ )  $\delta$  163.98, 163.69, 132.55, 132.08, 132.07, 131.76, 131.49, 129.87, 129.75, 128.51, 127.86, 127.73, 125.64, 123.51, 123.26, 121.05, 85.26, 82.82, 78.06, 77.46, 77.04, 76.62, 73.47, 45.48, 19.88. Visible spectra,  $\lambda_{\text{max}}$  (nm,  $\epsilon$  ( $\text{M}^{-1} \text{cm}^{-1}$ )): 382 (31,700), 396 (31,700); IR ( $\text{cm}^{-1}$ ): C=O: 1655 (s), 1693 (s); C=C: 2143 (m), 2146 (m), 2210 (s).

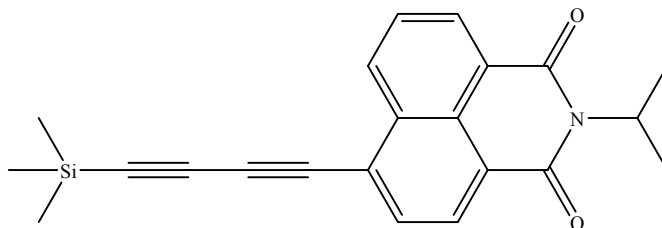

**Preparation of Me<sub>3</sub>Si-C<sub>4</sub>-NAP<sup>iPr</sup>.** A 3-neck round bottom flask was fitted with a side-arm containing CuI (450 mg, 2.4 mmol) and charged with trimethylsilyl acetylene (1.5 mL, 10.6 mmol) and dry THF (10 mL). Upon cooling to -10°C, nBuLi (2.5 M in hexane, 4.0 mL, 9.6 mmol) was added while stirring and warming to 0°C. After 20 min, CuI was added and the solution immediately turned orange. It was allowed to stir and warm to room temperature for 1 hr. Pyridine (20 mL) was added while the solution stirred at -10°C. A solution of dry THF (30 mL) and BrC<sub>2</sub>NAP<sup>iPr</sup> (1.0 gram, 2.9 mmol) was added dropwise over 1.5 h, the solution turned darker red. Upon complete addition, the reaction was allowed to stir an additional 10 min and quenched with CH<sub>3</sub>OH. The solvent was removed under vacuum. The crude material was extracted from brine with CH<sub>2</sub>Cl<sub>2</sub> and dried over MgSO<sub>4</sub>. Purification was achieved by rinsing the red solution through a CH<sub>2</sub>Cl<sub>2</sub> silica plug followed by column chromatography (silica gel, CH<sub>2</sub>Cl<sub>2</sub>). Recrystallization from CH<sub>2</sub>Cl<sub>2</sub> with CH<sub>3</sub>OH yielded 490 mg of Me<sub>3</sub>Si-C<sub>4</sub>-NAP<sup>iPr</sup> as a yellow solid. (47% based on BrC<sub>2</sub>NAP<sup>iPr</sup>). <sup>1</sup>H NMR (300 MHz, Chloroform-*d*) δ 8.62 – 8.60 (m, 1H), 8.58 (d, *J* = 2.7 Hz, 1H), 8.48 (d, *J* = 7.6 Hz, 1H), 7.91 (d, *J* = 7.6 Hz, 1H), 7.81 (dd, *J* = 8.3, 7.4 Hz, 1H), 5.41 (p, *J* = 6.9 Hz, 1H), 1.59 (d, *J* = 6.9 Hz, 6H), 0.29 (s, 9H). <sup>13</sup>C NMR (75 MHz, CDCl<sub>3</sub>) δ 163.95, 163.65, 132.36, 132.26, 131.69, 131.51, 129.80, 127.82, 127.78, 125.22, 123.53, 123.42, 95.08, 87.11, 82.81, 77.45, 77.03, 76.60, 73.15, 45.48, 19.86, 1.18. Visible spectra, λ<sub>max</sub> (nm, ε (M<sup>-1</sup> cm<sup>-1</sup>)): 366 (17,200), 385 (19,800); IR (cm<sup>-1</sup>): C=O: 1654 (s), 1696 (s); C≡C: 2101 (s), 2205 (m).

**Table S1.** TD-DFT computed vibrational frequencies and IR intensities ( $I$ ) for D-C4-NAP in toluene and DCM in the ground and excited states at  $\theta = 0$ .

| States              | $\nu_{C=O,as} / \text{cm}^{-1}$<br>( $I / \text{km/mol}$ ) | $\nu_{C=O,ss} / \text{cm}^{-1}$<br>( $I / \text{km/mol}$ ) | $\nu_{C=C,as} / \text{cm}^{-1}$<br>( $I / \text{km/mol}$ ) | $\nu_{C=C,ss} / \text{cm}^{-1}$<br>( $I / \text{km/mol}$ ) |
|---------------------|------------------------------------------------------------|------------------------------------------------------------|------------------------------------------------------------|------------------------------------------------------------|
| In toluene          |                                                            |                                                            |                                                            |                                                            |
| $S_0$               | 1793.6<br>(594)                                            | 1831.5<br>(571)                                            | 2257.7<br>(45)                                             | 2328.4<br>(1602)                                           |
| $S_3$ (TD-DFT)      | 1740.5<br>(776)                                            | 1780.1<br>(878)                                            | 2129.8<br>(514)                                            | 2197.5<br>(3077)                                           |
| $S_1$ (TD-DFT)      | 1750.1<br>(825)                                            | 1784.5<br>(2941)                                           | 2139.2<br>(2387)                                           | 2187.7<br>(19729)                                          |
| $T_1$ (variational) | 1738.9<br>(671)                                            | 1789.3<br>(1257)                                           | 2020.5<br>(108)                                            | 2129.1<br>(3361)                                           |
| In DCM              |                                                            |                                                            |                                                            |                                                            |
| $S_0$               | 1781.2<br>(812)                                            | 1823.5<br>(693)                                            | 2254.1<br>(101)                                            | 2322.3<br>(2152)                                           |
| $S_3$ (TD-DFT)      | 1724.2<br>(1110)                                           | 1768.8<br>(1326)                                           | 2124.3<br>(1051)                                           | 2191.4<br>(4112)                                           |
| $S_1$ (TD-DFT)      | 1731.2<br>(1309)                                           | 1771.0<br>(3690)                                           | 2136.1<br>(1744)                                           | 2188.3<br>(16318)                                          |
| $T_1$ (variational) | 1728.1<br>(1114)                                           | 1776.2<br>(2524)                                           | 2065.0<br>(3209)                                           | 2119.2<br>(6840)                                           |

**Table S2.** TD-DFT computed vibrational frequencies and IR intensities ( $I$ ) for Ph-C4-NAP in toluene and DCM in the ground and excited states at  $\theta = 0$ .

| States              | $\nu_{C=O,as} / \text{cm}^{-1}$<br>( $I / \text{km/mol}$ ) | $\nu_{C=O,ss} / \text{cm}^{-1}$<br>( $I / \text{km/mol}$ ) | $\nu_{C=C,as} / \text{cm}^{-1}$<br>( $I / \text{km/mol}$ ) | $\nu_{C=C,ss} / \text{cm}^{-1}$<br>( $I / \text{km/mol}$ ) |
|---------------------|------------------------------------------------------------|------------------------------------------------------------|------------------------------------------------------------|------------------------------------------------------------|
| In toluene          |                                                            |                                                            |                                                            |                                                            |
| $S_0$               | 1795.2<br>(592)                                            | 1833.7<br>(507)                                            | 2266.0<br>(0)                                              | 2349.2<br>(189)                                            |
| $S_4$ (TD-DFT)      | 1736.9<br>(787)                                            | 1773.7<br>(2787)                                           | 2147.5<br>(295)                                            | 2313.0<br>(31540)                                          |
| $S_1$ (TD-DFT)      | 1752.3<br>(735)                                            | 1791.6<br>(2063)                                           | 2120.5<br>(447)                                            | 2144.8<br>(957)                                            |
| $T_1$ (variational) | 1732.6<br>(513)                                            | 1794.7<br>(812)                                            | 1970.2<br>(525)                                            | 2157.8<br>(369)                                            |
| In DCM              |                                                            |                                                            |                                                            |                                                            |
| $S_0$               | 1782.8<br>(807)                                            | 1825.5<br>(622)                                            | 2264.4<br>(1)                                              | 2347.6<br>(244)                                            |
| $S_4$ (TD-DFT)      | 1720.8<br>(1234)                                           | 1761.7<br>(3335)                                           | 2148.3<br>(149)                                            | 2321.9<br>(33594)                                          |
| $S_1$ (TD-DFT)      | 1735.7<br>(1067)                                           | 1778.3<br>(2921)                                           | 2119.1<br>(788)                                            | 2144.7<br>(375)                                            |
| $T_1$ (variational) | 1723.7<br>(736)                                            | 1783.4<br>(1156)                                           | 1971.7<br>(825)                                            | 2155.4<br>(681)                                            |

**Table S3.** TD-DFT computed vibrational frequencies and IR intensities (*I*) for Si-C4-NAP in toluene and DCM in the ground and excited states at  $\theta = 0$ .

| States                       | $\nu_{C=O,as} / \text{cm}^{-1}$<br>( <i>I</i> / km/mol) | $\nu_{C=O,ss} / \text{cm}^{-1}$<br>( <i>I</i> / km/mol) | $\nu_{C=C,as} / \text{cm}^{-1}$<br>( <i>I</i> / km/mol) | $\nu_{C=C,ss} / \text{cm}^{-1}$<br>( <i>I</i> / km/mol) |
|------------------------------|---------------------------------------------------------|---------------------------------------------------------|---------------------------------------------------------|---------------------------------------------------------|
| In toluene                   |                                                         |                                                         |                                                         |                                                         |
| S <sub>0</sub>               | 1795.7<br>(591)                                         | 1834.0<br>(456)                                         | 2224.3<br>(113)                                         | 2344.0<br>(2)                                           |
| S <sub>1</sub> (TD-DFT)      | 1745.2<br>(729)                                         | 1783.4<br>(960)                                         | 2104.2<br>(57)                                          | 2126.4<br>(0.5)                                         |
| T <sub>1</sub> (variational) | 1731.5<br>(497)                                         | 1790.0<br>(596)                                         | 1997.7<br>(363)                                         | 2152.1<br>(15)                                          |
| In DCM                       |                                                         |                                                         |                                                         |                                                         |
| S <sub>0</sub>               | 1783.3<br>(805)                                         | 1826.0<br>(566)                                         | 2221.9<br>(114)                                         | 2343.1<br>(2)                                           |
| S <sub>1</sub> (TD-DFT)      | 1728.5<br>(1056)                                        | 1771.9<br>(1422)                                        | 2107.9<br>(184)                                         | 2128.8<br>(4)                                           |
| T <sub>1</sub> (variational) | 1722.3<br>(723)                                         | 1780.7<br>(817)                                         | 1997.4<br>(519)                                         | 2150.7<br>(7)                                           |

**Table S4.** TD-DFT computed vibrational frequencies and IR intensities (*I*) for D-C4-NAP with different dihedral angles in DCM in the ground and excited states.

| Dihedral angle / degrees | $\nu_{C=O,as}$ / $\text{cm}^{-1}$<br>( <i>I</i> / km/mol) | $\nu_{C=O,ss}$ / $\text{cm}^{-1}$<br>( <i>I</i> / km/mol) | $\nu_{C=C,as}$ / $\text{cm}^{-1}$<br>( <i>I</i> / km/mol) | $\nu_{C=C,ss}$ / $\text{cm}^{-1}$<br>( <i>I</i> / km/mol) |
|--------------------------|-----------------------------------------------------------|-----------------------------------------------------------|-----------------------------------------------------------|-----------------------------------------------------------|
| Ground state             |                                                           |                                                           |                                                           |                                                           |
| 0                        | 1781.2<br>(812)                                           | 1823.5<br>(693)                                           | 2254.1<br>(101)                                           | 2322.3<br>(2152)                                          |
| 90                       | 1782.4<br>(806)                                           | 1825.0<br>(597)                                           | 2255.6<br>(105)                                           | 2339.7<br>(854)                                           |
| Excited state $S_1$      |                                                           |                                                           |                                                           |                                                           |
| 0                        | 1731.2<br>(1309)                                          | 1771.0<br>(3690)                                          | 2136.1<br>(1744)                                          | 2188.3<br>(16317)                                         |
| 15                       | 1731.5<br>(1322)                                          | 1771.2<br>(3706)                                          | 2132.1<br>(1865)                                          | 2177.1<br>(15966)                                         |
| 30                       | 1732.2<br>(1385)                                          | 1771.8<br>(3711)                                          | 2119.8<br>(2650)                                          | 2145.3<br>(15044)                                         |
| 45                       | 1733.1<br>(1500)                                          | 1772.5<br>(3702)                                          | 2105.1<br>(4275)                                          | 2094.9<br>(14620)                                         |
| 60                       | 1734.3<br>(1609)                                          | 1773.4<br>(3667)                                          | 2081.7<br>(803)                                           | 2060.8<br>(21051)                                         |
| 75                       | 1735.2<br>(1654)                                          | 1773.8<br>(3617)                                          | 2068.0<br>(1850)                                          | 2044.3<br>(22509)                                         |
| 90                       | 1735.3<br>(1671)                                          | 1773.9<br>(3573)                                          | 2063.9<br>(2661)                                          | 2040.0<br>(22483)                                         |
| Excited state $S_2$      |                                                           |                                                           |                                                           |                                                           |
| 0                        | 1768.7<br>(962)                                           | 1794.2<br>(944)                                           | 1814.9<br>(869)                                           | 2130.3<br>(1557)                                          |
| 15                       | 1765.0<br>(1041)                                          | 1797.0<br>(1986)                                          | 1822.4<br>(179)                                           | 2119.5<br>(2379)                                          |
| 30                       | 1747.0<br>(1140)                                          | 1784.6<br>(2694)                                          | 1935.0<br>(463)                                           | 1984.0<br>(1749)                                          |
| 45                       | 1732.2<br>(1089)                                          | 1772.4<br>(2212)                                          | 2081.8<br>(3)                                             | 1963.4<br>(1041)                                          |
| 60                       | 1727.2<br>(1085)                                          | 1769.7<br>(1744)                                          | 2146.0<br>(178)                                           | 2056.0<br>(136)                                           |
| 75                       | 1725.2<br>(1104)                                          | 1769.1<br>(1432)                                          | 2180.9<br>(2065)                                          | 2109.2<br>(430)                                           |
| 90                       | 1724.2<br>(1110)                                          | 1768.8<br>(1327)                                          | 2191.4<br>(4112)                                          | 2124.2&<br>(1051)                                         |

**Table S5.** TD-DFT computed energy, dipole moment and oscillator strength at different dihedral angles for D-C4-NAP in DCM in the ground and excited states.

| Dihedral angle / degrees     | Energy / eV | $\mu / D$ | $f$  |
|------------------------------|-------------|-----------|------|
| Ground state                 |             |           |      |
| 0                            | 0.000       | 11.6      | -    |
| 90                           | 0.025       | 10.7      | -    |
| Excited state S <sub>1</sub> |             |           |      |
| 0                            | 2.444       | 32.0      | 1.79 |
| 15                           | 2.446       | 32.4      | 1.70 |
| 30                           | 2.450       | 33.6      | 1.42 |
| 45                           | 2.451       | 35.3      | 0.97 |
| 60                           | 2.449       | 37.1      | 0.47 |
| 75                           | 2.443       | 38.3      | 0.12 |
| 90                           | 2.439       | 38.7      | 0.00 |
| Excited state S <sub>2</sub> |             |           |      |
| 0                            | 3.212       | 16.6      | 0.00 |
| 15                           | 3.216       | 16.7      | 0.10 |
| 30                           | 3.209       | 18.3      | 0.36 |
| 45                           | 3.159       | 18.9      | 0.63 |
| 60                           | 3.105       | 18.0      | 0.92 |
| 75                           | 3.068       | 17.0      | 1.15 |
| 90                           | 3.055       | 16.6      | 1.24 |



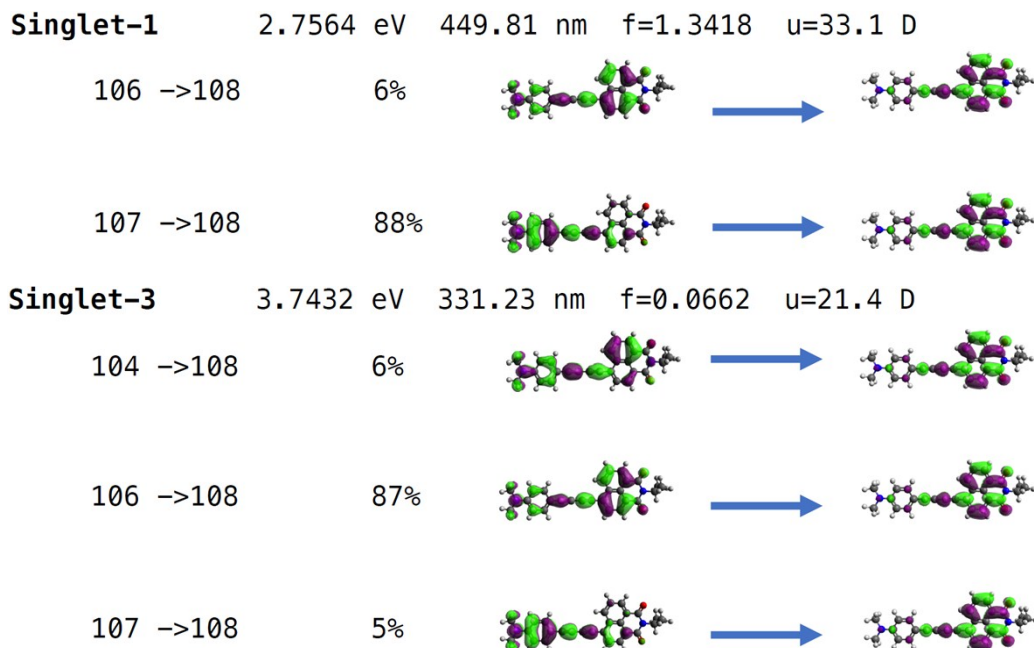

**Fig. S1.** TD-DFT results showing the dominant orbital contribution to the  $S_1$  and  $S_3$  state for D-C4-NAP in DCM. The transition energy, wavelength, oscillator strength ( $f$ ) and dipole moment are shown.

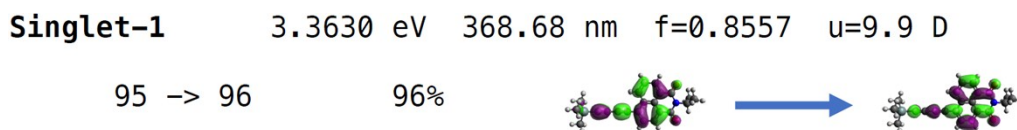

**Fig. S2.** TD-DFT results showing the dominant orbital contribution to the  $S_1$  state for Si-C4-NAP in DCM. The transition energy, wavelength, oscillator strength ( $f$ ) and dipole moment are shown.

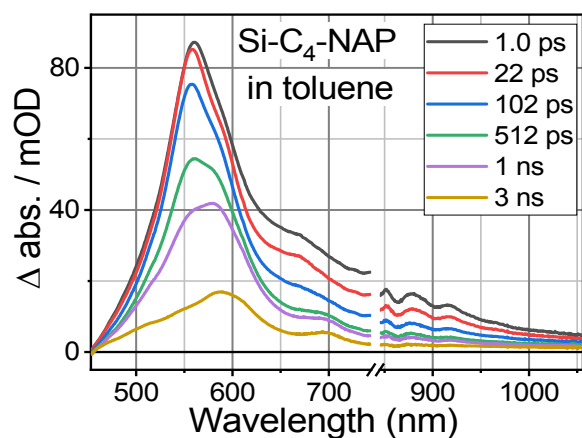

**Fig. S3.** Transient spectra in visible region for Si-C4-NAP in toluene excited by 400 nm pulses.

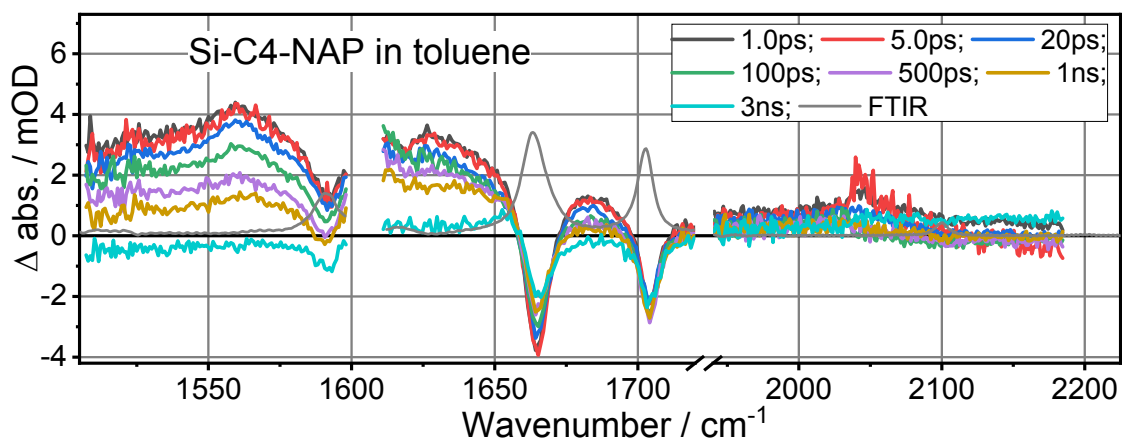

**Fig. S4.** Transient spectra in mid-IR region for Si-C4-NAP in toluene excited by 400 nm pulses.

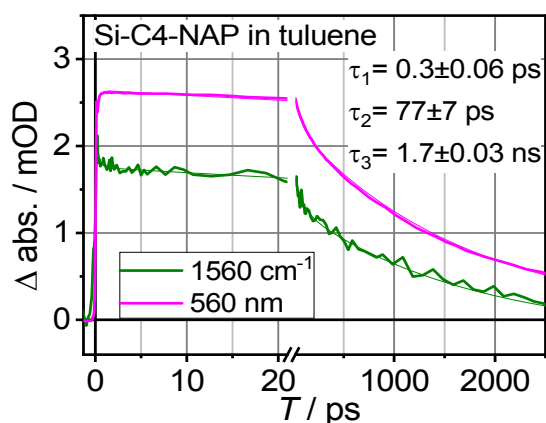

**Fig. S5.** Transient kinetics for Si-C4-NAP in toluene at indicated frequencies (thick lines, 560 nm line was normalized by 0.03 to match the intensities) and their fits with three-exponential functions (thin lines of matching colors). The fit parameters are shown as inset.

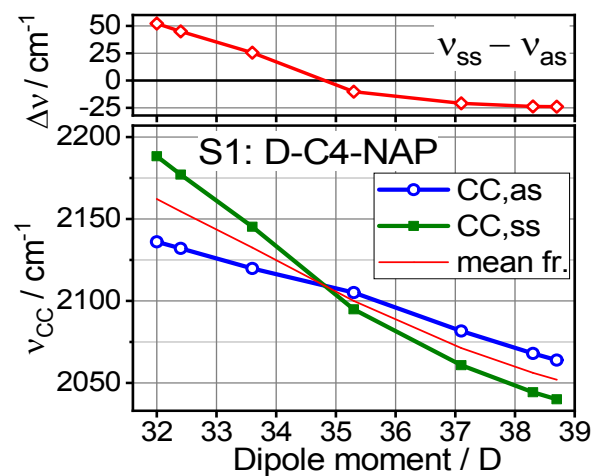

**Fig. S6.** (top) The frequency difference between  $\nu_{CC,ss}$  and  $\nu_{CC,as}$  as a function of the dipole moment of the D-C4-NAP compound in S<sub>1</sub> state, DFT computed in DCM. (bottom) A correlation of the  $\nu_{CC,ss}$  and  $\nu_{CC,as}$  mode frequencies with the dipole moment of the compound.

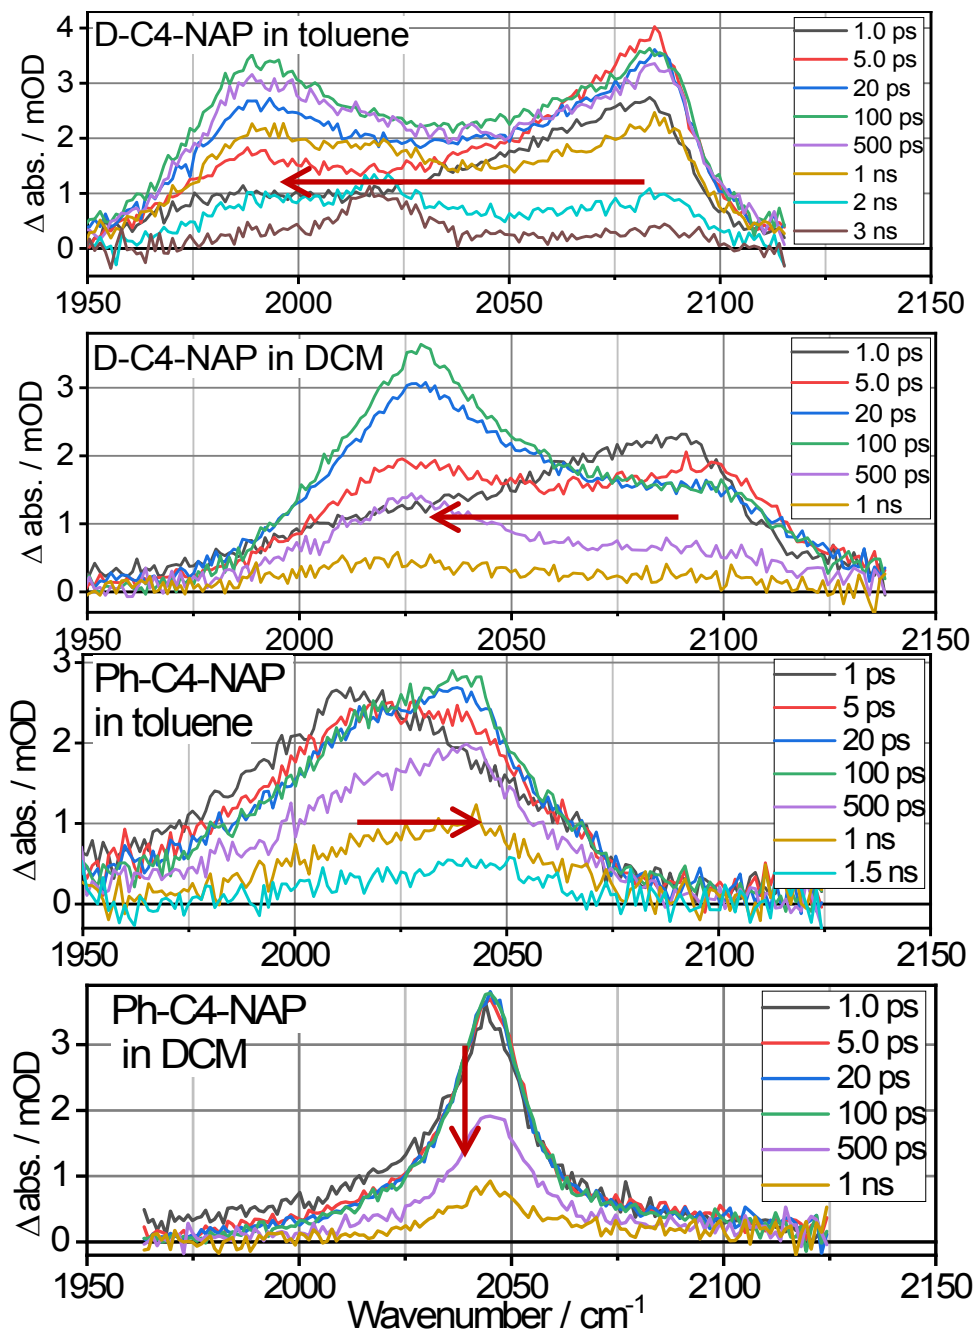

**Fig. S7.** Transient absorption spectra for the four systems in the C≡C region.

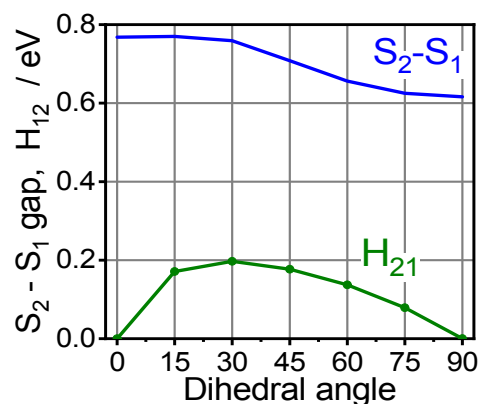

**Fig. S8.** Computed  $S_2-S_1$  energy gap and the  $H_{DA}$  ( $H_{12}$ ) coupling dependences on torsional angle  $\theta$ .

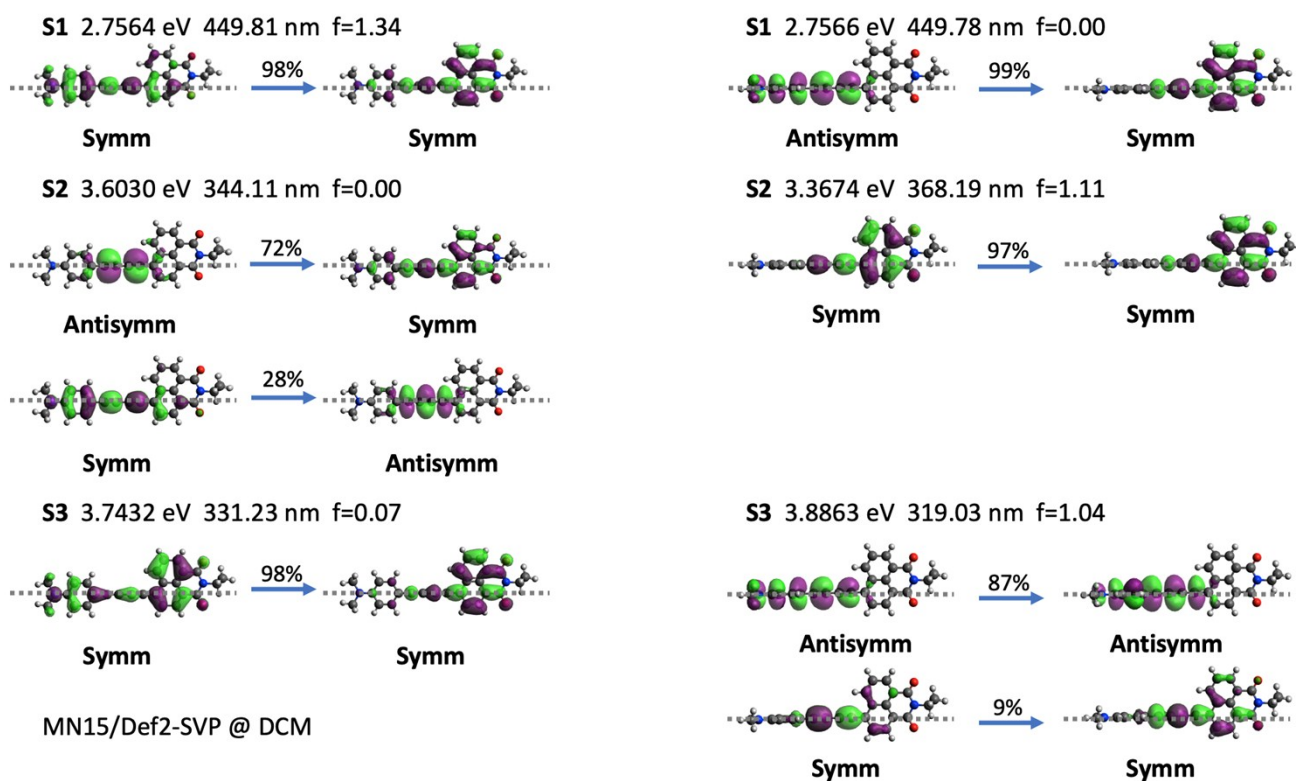

**Fig. S9.** Leading natural transition orbitals for  $S_0 \rightarrow S_1$  and  $S_0 \rightarrow S_2$  transitions of D-C4-NAP with their contributions in % above the arrow. The transition energy (in eV), transition wavelength, and the oscillator strength ( $f$ ) values are shown. The symmetry of the orbitals with respect to the plane shown with dots is indicated.

MN15/Def2-SVP  
@ DCM

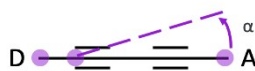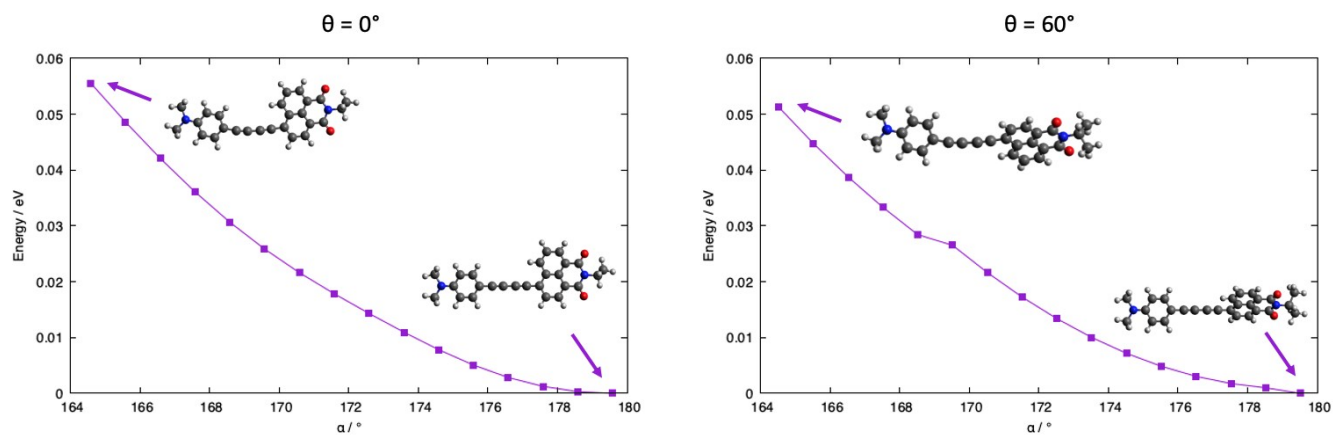

| State | $\alpha = 165^\circ$ |      | $\alpha = 180^\circ$ |      |
|-------|----------------------|------|----------------------|------|
|       | Energy / eV          | f    | Energy / eV          | f    |
| S1    | 2.75                 | 1.27 | 2.76                 | 1.34 |
| S2    | 3.59                 | 0.00 | 3.60                 | 0.00 |
| S3    | 3.74                 | 0.09 | 3.74                 | 0.07 |
| S4    | 3.85                 | 0.00 | 3.88                 | 0.00 |

| State | $\alpha = 165^\circ$ |      | $\alpha = 180^\circ$ |      |
|-------|----------------------|------|----------------------|------|
|       | Energy / eV          | f    | Energy / eV          | f    |
| S1    | 2.75                 | 0.47 | 2.76                 | 0.39 |
| S2    | 3.41                 | 0.76 | 3.40                 | 0.83 |
| S3    | 3.81                 | 0.38 | 3.84                 | 0.49 |
| S4    | 3.96                 | 0.24 | 3.97                 | 0.23 |

**Fig. S10.** (top) Ground state energies as a function of the bend angle  $\alpha$  at two torsion angles  $\theta$  of  $0^\circ$  (left) and  $60^\circ$  (right) for D-C4-NAP in DCM. (bottom) The energies and oscillator strengths for  $S_1 - S_4$  singlet excited states for two bend angles:  $\alpha = 165^\circ$  and  $\alpha = 180^\circ$ .

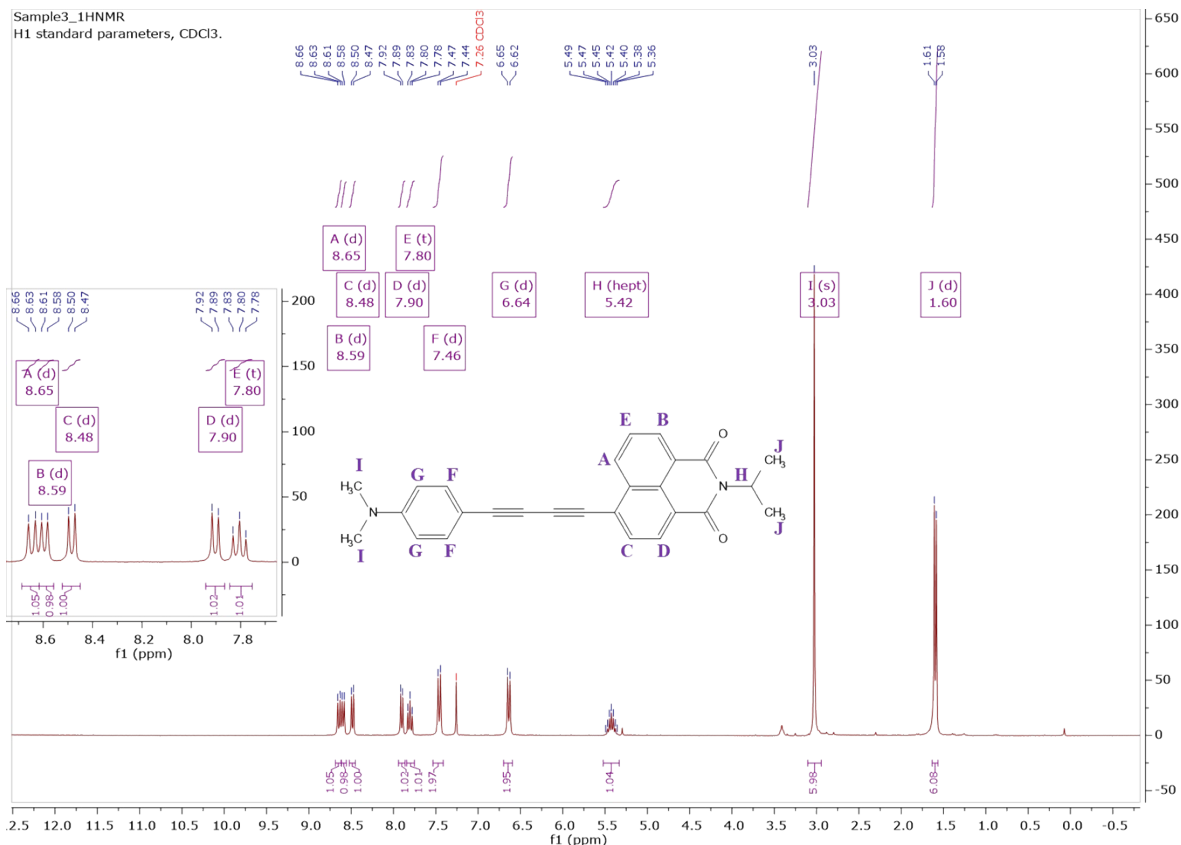

**Fig. S11.** <sup>1</sup>H NMR Spectra of D-C<sub>4</sub>-NAPiPr

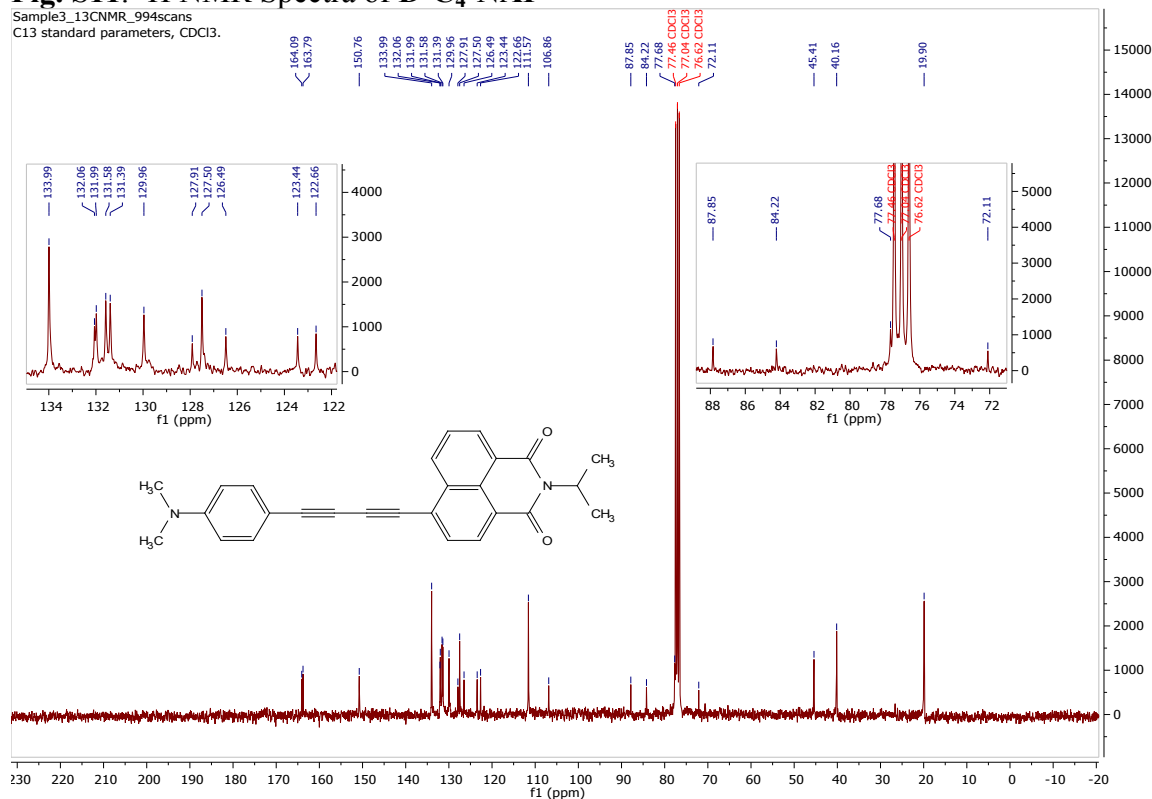

**Fig. S12.** <sup>13</sup>C NMR Spectra of D-C<sub>4</sub>-NAPiPr

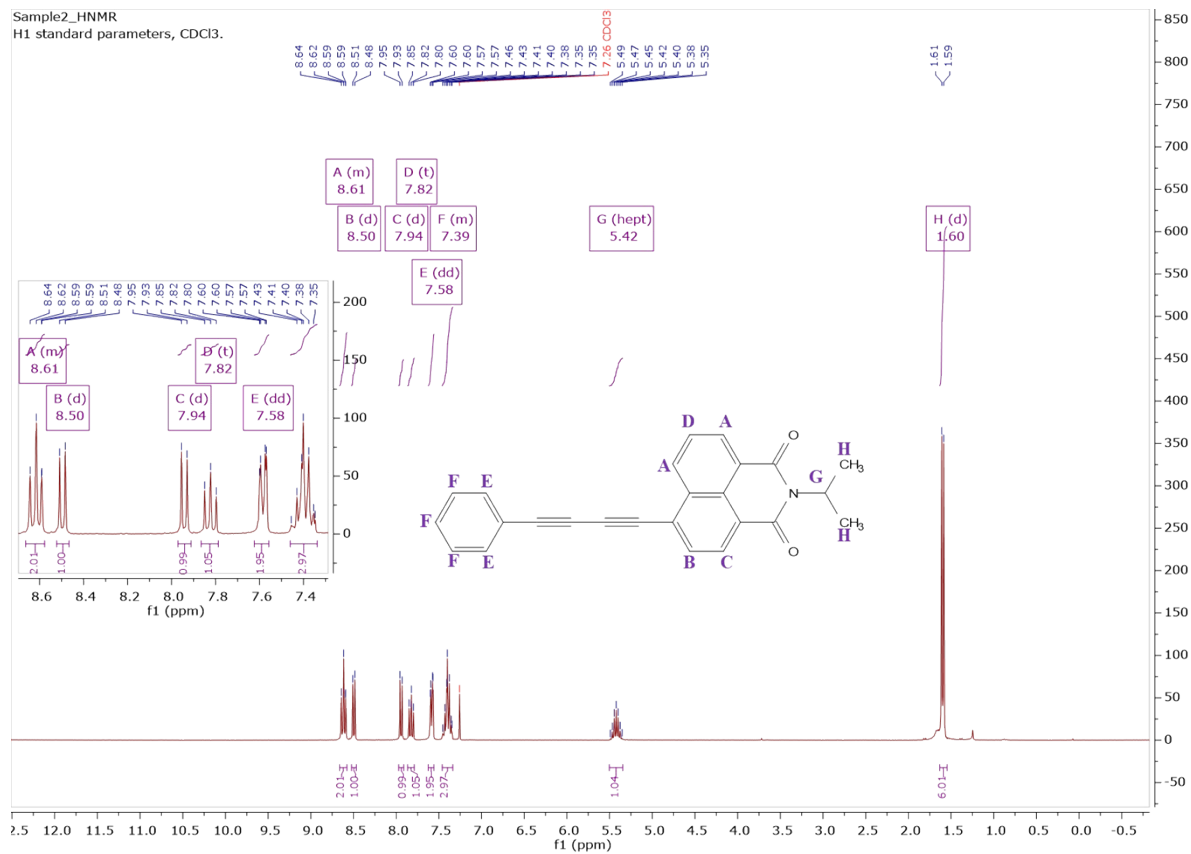

**Fig. S13.** <sup>1</sup>H NMR Spectra of Ph-C<sub>4</sub>-NAPiPr

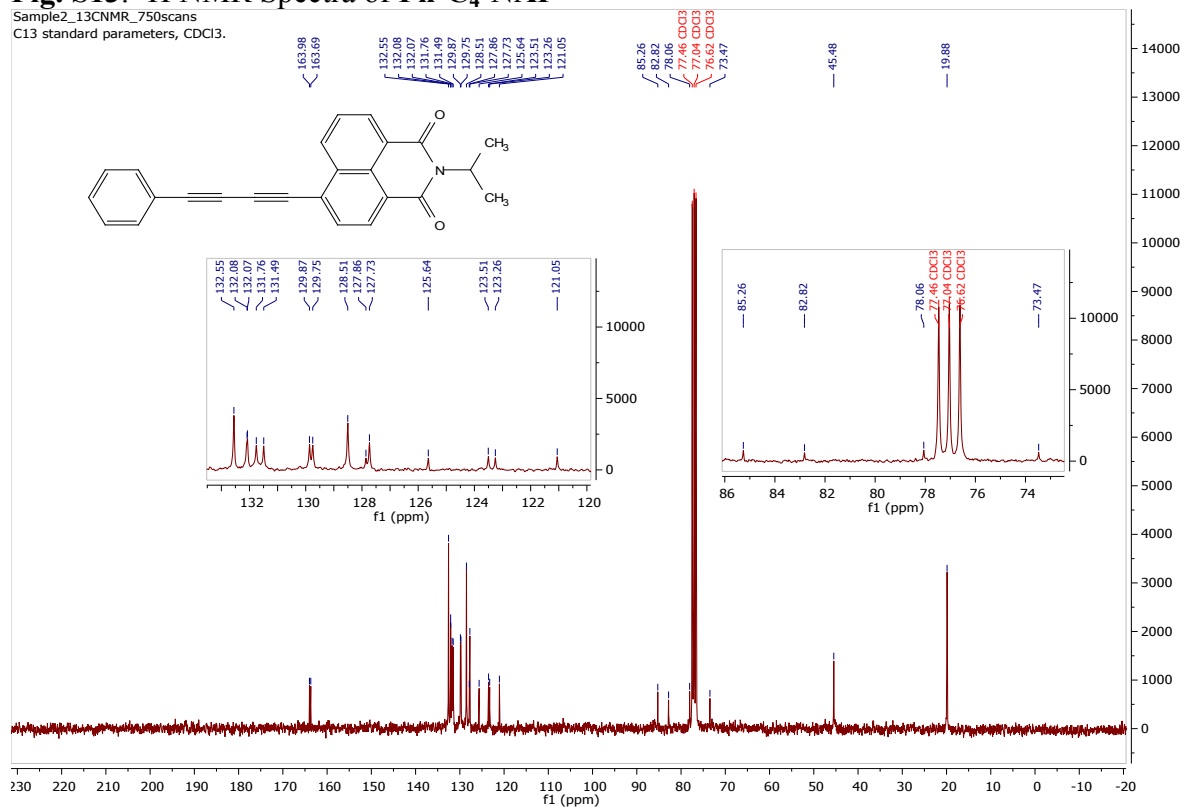

**Fig. S14.** <sup>13</sup>C NMR Spectra of Ph-C<sub>4</sub>-NAPiPr



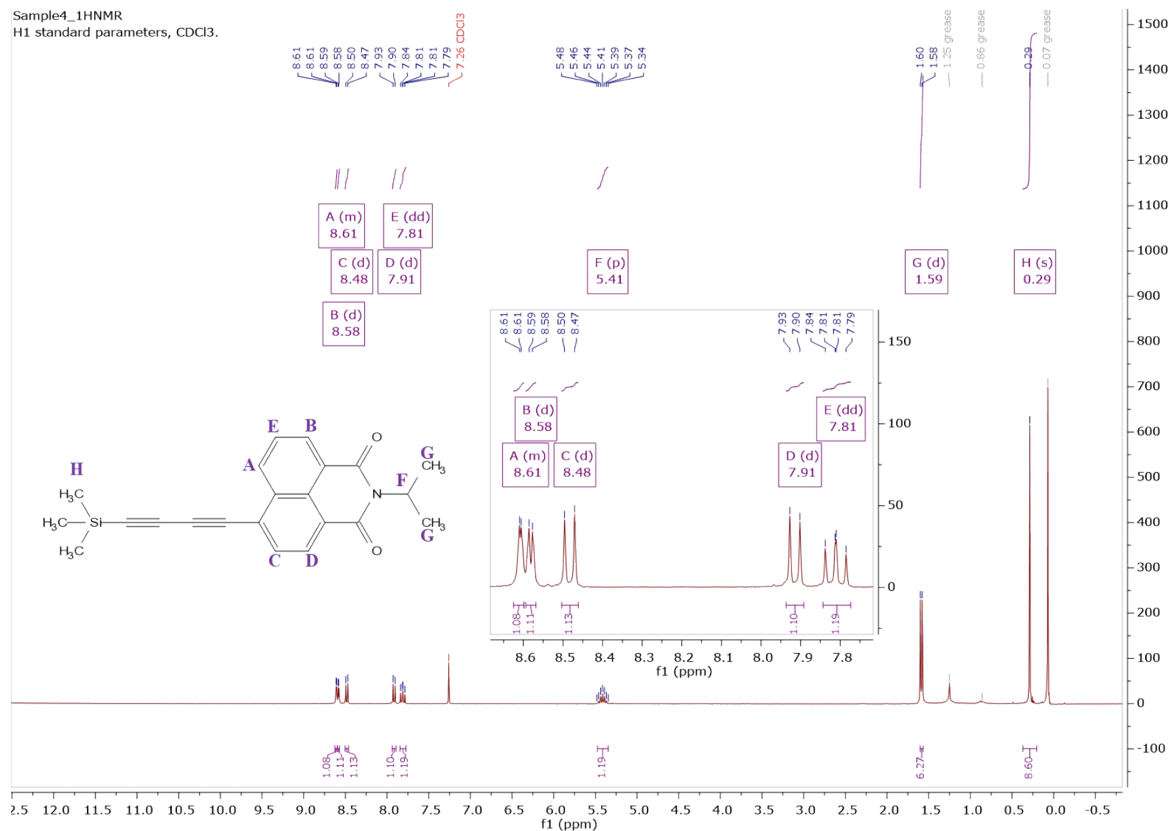

**Fig. S15.** <sup>1</sup>H NMR Spectra of TMS-C<sub>4</sub>-NAPiPr

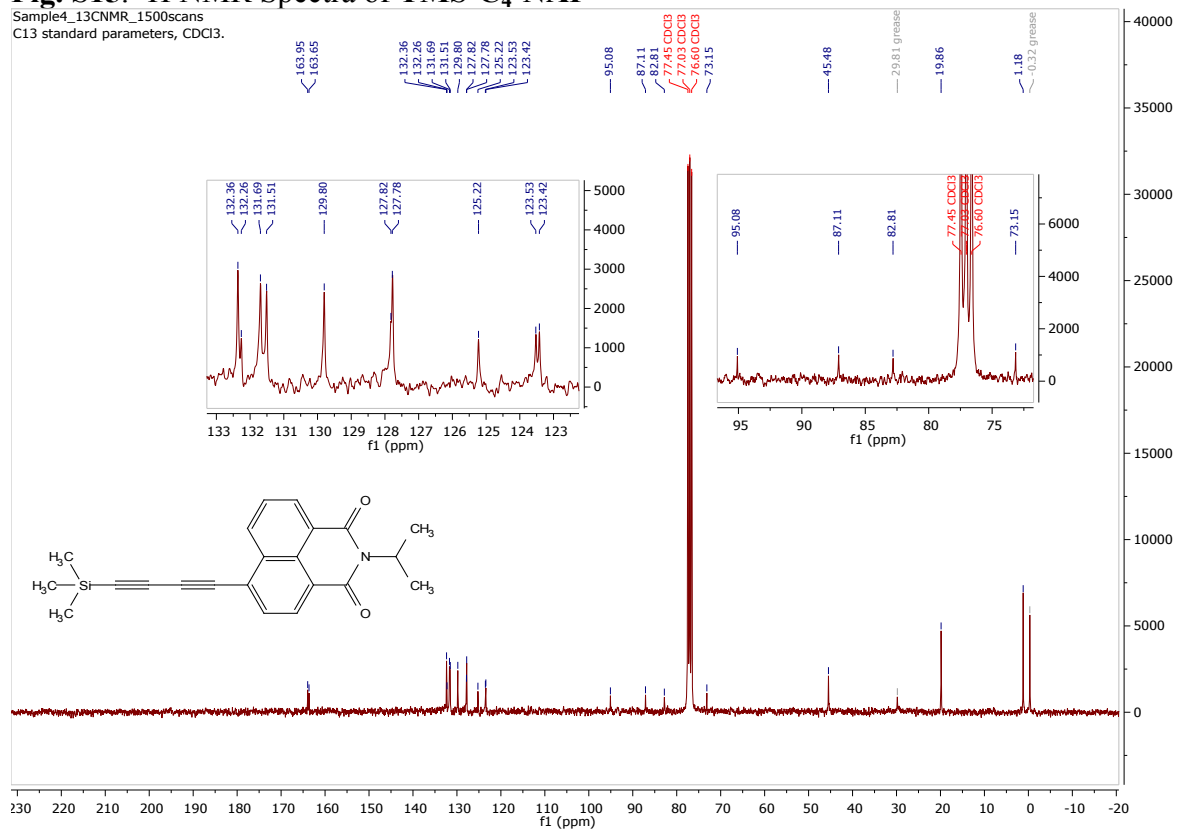

**Fig. S16.** <sup>13</sup>C NMR Spectra of TMS-C<sub>4</sub>-NAPiPr

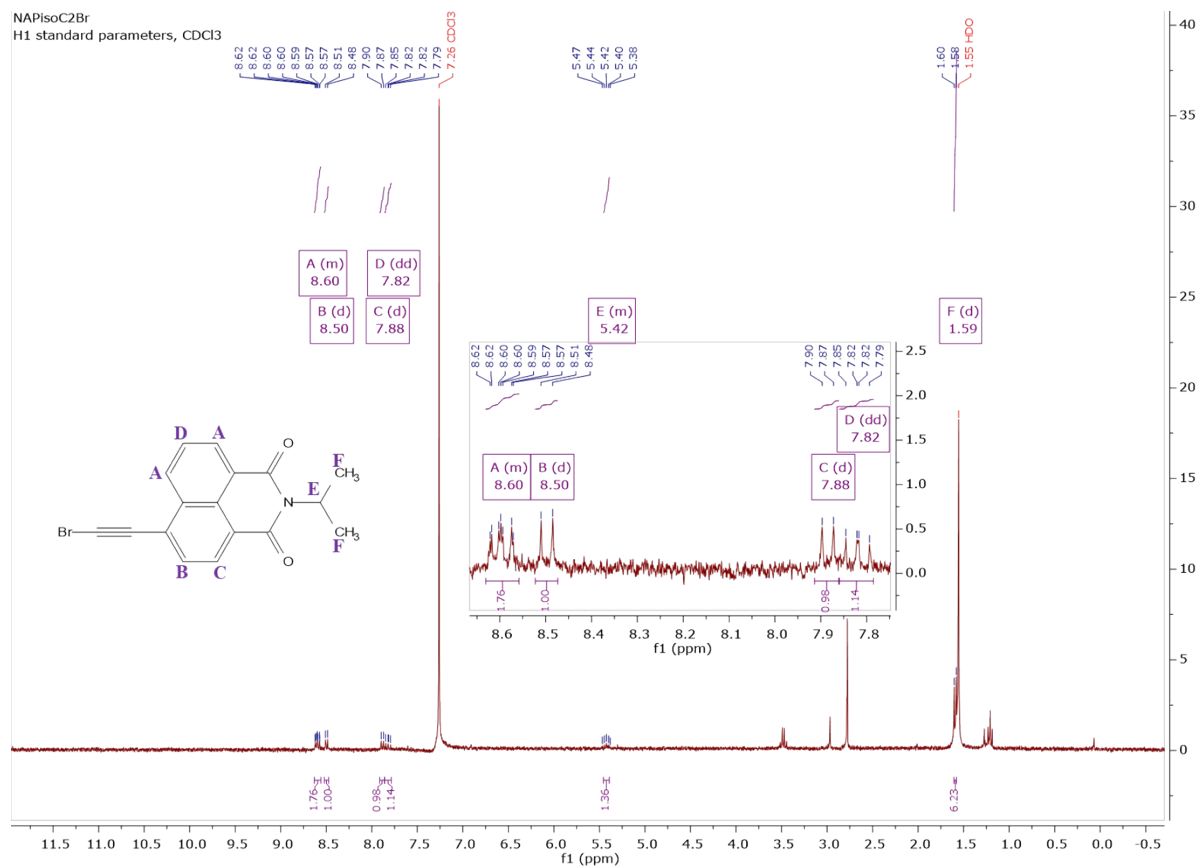

**Fig. S17.** <sup>1</sup>H NMR Spectra of Br-C<sub>2</sub>-NAPiPr

1. Susannah D. Banziger, Eileen C. Judkins, M. Z. and T. R. Diruthenium-DMBA Bis-Alkynyl Compounds with Hetero- and Extended- Aryl Appendant. *Chinese J. Inorg. Chem.* **33**, 2103–2109 (2017).
